# Supplementary material for: One Year after Mild COVID-19: The Majority of Patients Maintain Specific Immunity, But One in Four Still Suffer from Long-Term Symptoms
Source: MDPI journal article supplement (doi:10.3390/jcm10153305), 2021-07-27
Supplement: s1 [file s1]

**Table S1:** Frequency of persistent symptoms after mild COVID-19 (total number: 83).

|                               | >1 month | >3 months | >6 months | >12 months |
|-------------------------------|----------|-----------|-----------|------------|
| <b>Any persistent symptom</b> | 51 (61%) | 41 (49%)  | 36 (43%)  | 23 (28%)   |
| Loss of smell                 | 24 (29%) | 21 (25%)  | 16 (19%)  | 9 (11%)    |
| Loss of taste                 | 18 (22%) | 16 (19%)  | 14 (17%)  | 8 (10%)    |
| Concentration disorder        | 16 (19%) | 15 (18%)  | 14 (17%)  | 10 (12%)   |
| Headache                      | 15 (18%) | 15 (18%)  | 15 (18%)  | 11 (13%)   |
| Dyspnoe (excertion)           | 15 (18%) | 10 (12%)  | 10 (12%)  | 6 (7%)     |
| Back pain                     | 9 (11%)  | 9 (11%)   | 9 (11%)   | 4 (5%)     |
| Muscle pain                   | 7 (8%)   | 7 (8%)    | 7 (8%)    | 5 (6%)     |
| Thoracic pain                 | 5 (6%)   | 3 (3%)    | 3 (3%)    | 0 (0%)     |

**Table S2.** Correlation analysis between humoral and cellular immunity of non-vaccinated participants at 12 months follow-up. THC: T helper cells. Nab: neutralizing antibodies, SI: stimulation index.

|                          | INFg ELISPOT assay (SI) |       |                  | IL-2 ELISPOT assay (SI) |        |              | AIM assay (THC%) |       |              |
|--------------------------|-------------------------|-------|------------------|-------------------------|--------|--------------|------------------|-------|--------------|
|                          | R <sup>2</sup>          | cc    | p value          | R <sup>2</sup>          | cc     | p value      | R <sup>2</sup>   | cc    | p value      |
| <b>IgA assay (value)</b> | 0.001                   | 0.136 | 0.242            | 0.003                   | -0.053 | 0.664        | 0.005            | 0.207 | 0.086        |
| <b>IgG assay (value)</b> | 0.151                   | 0.355 | <b>0.002</b>     | 0.061                   | 0.256  | <b>0.032</b> | 0.050            | 0.264 | <b>0.027</b> |
| <b>Nab assay (titer)</b> | 0.175                   | 0.392 | <b>&gt;0.001</b> | 0.062                   | 0.278  | <b>0.020</b> | 0.075            | 0.297 | <b>0.013</b> |

## COVID-19 Questionnaire

Name/Date of birth:

Date:

|                                                                                        | No | Yes | Description, if you answered Yes      |
|----------------------------------------------------------------------------------------|----|-----|---------------------------------------|
| Have you had any of the following since recovering from COVID-19:                      |    |     | When? How long? Completely recovered? |
| episodes of fever?                                                                     |    |     |                                       |
| any influenza or influenza-like infection?                                             |    |     |                                       |
| After acute COVID-19, did you suffer for a longer time period / until now from...      |    |     | How long? Completely recovered?       |
| Loss of the sense of smell ?                                                           |    |     |                                       |
| Loss of the sense of taste ?                                                           |    |     |                                       |
| Difficulty in concentrating ?                                                          |    |     |                                       |
| Headache ?                                                                             |    |     |                                       |
| Back pain ?                                                                            |    |     |                                       |
| Muscle pain ?                                                                          |    |     |                                       |
| Shortness of breath ?                                                                  |    |     | At rest? During exercise?             |
| Do you suffer from any new illness or discomfort since recovering from COVID-19 ?      |    |     |                                       |
| Were thrombosis or lung embolism diagnosed at any time during or after COVID-19 ?      |    |     |                                       |
| Did you take blood-thinning medication during COVID-19 (Aspirin, Heparin, or others) ? |    |     |                                       |
| Do you take any new medication since recovering from COVID-19 ?                        |    |     |                                       |

Please mark on a scale of - 5 to 0 points how your resilience and fitness has developed since the COVID-19 disease until now. A score of - 5 means that you still feel as ill as you did during the COVID-19 period, and 0 means that you have regained the full strength that you had before COVID-19.

|                   |     |     |                             |     |                                |  |
|-------------------|-----|-----|-----------------------------|-----|--------------------------------|--|
| - 5               | - 4 | - 3 | - 2                         | - 1 | 0                              |  |
| <i>Still sick</i> |     |     | <i>completely recovered</i> |     | <i>even fitter than before</i> |  |

Thank you for your help!

Universitätsklinikum Augsburg A.ö.R., Standort: Stenglinstraße 2, 86156 Augsburg | Sauerbruchstraße 6, 86179 Augsburg, [www.uk-augsburg.de](http://www.uk-augsburg.de)  
 Vorstand: Vorstandsvorsitzender & Ärztlicher Direktor: Prof. Dr. med. Dr. h.c. Michael Beyer,  
 Kaufmännischer Direktor: Michael Bungarten, Pflegedirektorin: Susanne Arnold, Gründungsdekanin: Prof. Dr. med. Martina Kadmon  
 USt-ID: DE 320 913 762; Stadtparkasse Augsburg: IBAN DE92 7205 0000 0000 0680 80 / BIC AUGSDE77XXX;  
 Kreissparkasse Augsburg: IBAN DE11 7205 0101 0380 0032 10 / BIC BYLADEM1AUG; Deutsche Postbank: IBAN DE67 7601 0085 0118 9368 59 / BIC PBNKDEFFXXX

**Figure S1.** Structured questionnaire for follow-up after COVID-19.
